# Supplementary material for: Study of the Addition of a Thermoplastic Vulcanizate to a HDPE Composite Highly Filled with Magnesium Hydroxide and Its Effect on the Tensile and Flame Retardant Properties
Source: Hindawi journal article supplement (doi:10.1155/2019/4350870), 2019-10-17
Supplement: f1 [file 4350870.f1.zip]

Archive with 6 entries (6 files):
- Data for Figure 1.xlsx
- Data for Figure 2.xlsx
- Data for Figure 3.xlsx
- Data for Figure 4.xlsx
- Data for Figure 5.xlsx
- Data for Figure 6.xlsx
