# Supplementary material for: Study of the Addition of a Thermoplastic Vulcanizate to a HDPE Composite Highly Filled with Magnesium Hydroxide and Its Effect on the Tensile and Flame Retardant Properties
Source: Hindawi journal article supplement (doi:10.1155/2019/4350870), 2019-10-17
Supplement: f1 [file 4350870.f1.zip › Data for Figure 1.xlsx]

## Sheet: Hoja1
	Data for Figure 1
	Perox Conc	Gel content	Gel Content	Gel Content
	wt%	wt%	wt%	wt%
		Luperox	Perkadox	DCP
	0	0	0	0
	0.05	1.75	1.2	1.1
	0.1	2	1.5	1.3
	0.2	5	3.5	2.5
	0.5	14	11.5	4.9
