# Supplementary material for: Study of the Addition of a Thermoplastic Vulcanizate to a HDPE Composite Highly Filled with Magnesium Hydroxide and Its Effect on the Tensile and Flame Retardant Properties
Source: Hindawi journal article supplement (doi:10.1155/2019/4350870), 2019-10-17
Supplement: f1 [file 4350870.f1.zip › Data for Figure 2.xlsx]

## Sheet: Hoja1
	Data for Figure 2
	.	BLANC	TPO	Luperox	Perkadox	DCP
	Perox Conc	TS MPa	TS MPa	TS MPa	TS MPa	TS MPa
	-0.06	0
	-0.06	7
	-0.03		0
	-0.03		12
	0			0	0	0
	0.05			16	14	7
	0.1			16.2	14.2	7.7
	0.2			14.8	13	8
	0.5			12	11	9
