# Supplementary material for: Study of the Addition of a Thermoplastic Vulcanizate to a HDPE Composite Highly Filled with Magnesium Hydroxide and Its Effect on the Tensile and Flame Retardant Properties
Source: Hindawi journal article supplement (doi:10.1155/2019/4350870), 2019-10-17
Supplement: f1 [file 4350870.f1.zip › Data for Figure 3.xlsx]

## Sheet: Hoja1
	Data for Figure 3
	.	BLANC	TPO	Luperox	Perkadox	DCP
	Perox Conc	Elongation %	Elongation %	Elongation %	Elongation %	Elongation %
	-0.06	0
	-0.06	580
	-0.03		0
	-0.03		600
	0			0	0	0
	0.05			740	700	390
	0.1			740	700	330
	0.2			680	640	275
	0.5			560	530	220
