# Supplementary material for: Study of the Addition of a Thermoplastic Vulcanizate to a HDPE Composite Highly Filled with Magnesium Hydroxide and Its Effect on the Tensile and Flame Retardant Properties
Source: Hindawi journal article supplement (doi:10.1155/2019/4350870), 2019-10-17
Supplement: f1 [file 4350870.f1.zip › Data for Figure 4.xlsx]

## Sheet: Hoja1
	Data for Figure 4
	TPO/TPV content	time to extinguish	time to extinguish
	wt%	seconds	seconds
	10	83	78
	20	63	42
	30	61	40
	40	48	37
	--	--	--
	--	--	--
	--	--	--
	--	--	--
	--	--	--
	--	--	--
	--	--	--
	--	--	--
	--	--	--
	--	--	--
	--	--	--
	--	--	--
	--	--	--
