# Supplementary material for: Study of the Addition of a Thermoplastic Vulcanizate to a HDPE Composite Highly Filled with Magnesium Hydroxide and Its Effect on the Tensile and Flame Retardant Properties
Source: Hindawi journal article supplement (doi:10.1155/2019/4350870), 2019-10-17
Supplement: f1 [file 4350870.f1.zip › Data for Figure 5.xlsx]

## Sheet: Hoja1
		PE	TPO20	TPO30	TPO40	TPV20	TPV30	TPV40
	time sec	(kJ/s)/m2	(kJ/s)/m2	(kJ/s)/m2	(kJ/s)/m2	(kJ/s)/m2	(kJ/s)/m2	(kJ/s)/m2
	0	1.0319	3.07193	6.23116	3.20746	0.41646	2.61044	2.96228
	5	2.1124	6.94157	2.76371	-0.8408	2.38026	5.02221	5.60272
	10	2.1912	2.35759	4.88923	-0.96681	6.09333	5.70838	6.38363
	15	3.0912	-1.19274	3.9655	3.67218	5.07183	-1.50977	3.02329
	20	3.2579	0.95246	2.81251	5.96405	5.65118	-3.27171	2.56167
	25	5.0025	3.31279	3.60105	10.9645	5.25557	-3.79062	4.16717
	30	5.2518	3.93165	7.1507	5.38491	1.43266	-1.88356	4.46712
	35	5.8923	-0.49309	10.2223	1.35238	0.43366	-1.26519	1.64051
	40	8.2878	-2.77796	9.28409	0.06248	1.15807	-0.35	1.02295
	45	12.7579	-2.13433	4.08184	1.97896	4.02015	-2.61697	8.57259
	50	15.2029	-1.47047	-0.70643	2.56666	2.20059	-2.67066	7.39432
	55	50.2829	-0.16935	3.52947	2.35345	1.38678	-1.64911	5.96614
	60	75.7875	3.75766	5.40103	4.66544	2.36677	-1.22091	4.28247
	65	100.252	4.16009	8.40589	5.26269	5.24442	-1.75745	2.88256
	70	140.789	1.40973	7.10734	4.13988	2.35528	-1.52738	2.09428
	75	160.988	-1.821	7.52858	3.16116	-0.25793	0.60106	4.01977
	80	180.278	-3.00014	6.11701	4.72414	0.2125	-1.51156	3.26958
	85	185.456	-0.96809	5.6779	6.44497	0.75817	-3.2263	9.13522
	90	190.025	0.53285	5.38908	4.98328	4.60361	-4.11142	6.94788
	95	195.757	3.84066	4.62515	6.35325	3.76897	-3.07392	6.08402
	100	200.784	2.6213	5.34636	9.11149	6.63435	-1.26116	6.70141
	105	210.124	0.69777	7.18683	9.31991	7.2419	1.16829	6.68015
	110	220.353	-0.73923	5.0349	48.0419	5.84812	3.28646	4.85638
	115	230.793	3.82225	13.3398	95.133	7.84093	5.02494	5.05205
	120	240.657	26.6027	52.3049	123.237	29.8147	2.46256	4.17862
	125	250.129	77.4356	82.3763	159.216	54.7428	4.00185	4.32493
	130	260.955	121.918	113.432	179.03	83.7651	5.8754	9.88803
	135	270.344	161.356	142.886	205.901	119.258	20.3249	34.7378
	140	280.898	182.388	171.391	214.196	134.749	46.2464	65.0009
	145	290.975	211.125	189.999	221.688	160.896	81.8798	102.57
	150	300.254	219.943	199.004	206.429	184.798	117.451	128.154
	155	375.855	239.748	217.406	206.304	194.533	145.491	148.685
	160	450.252	248.246	232.322	209.57	195.692	164.426	165.657
	165	520.975	256.532	228.914	210.757	202.884	191.222	180.49
	170	595.198	249.553	233.664	211.196	202.003	196.656	181.932
	175	670.375	253.724	230.642	200.603	201.438	201.212	197.968
	180	750.365	241.795	229.262	194.611	196.945	204.333	190.341
	185	820.587	242.075	221.393	196.142	187.893	207.209	191.149
	190	900.987	235.373	218.899	190.351	196.865	203.054	193.687
	195	950.785	232.078	222.771	190.916	196.557	199.235	195.727
	200	1000.4	223.548	217.788	193.484	196.339	194.092	194.09
	205	1065.99	227.778	223.326	196.384	189.336	195.029	202.015
	210	1130.66	226.891	221.504	190.567	188.692	198.708	191.852
	215	1195.58	219.832	212.756	193.719	181.381	195.113	178.106
	220	1250.59	219.459	207.969	194.385	178.852	185.416	183.849
	225	1325.59	214.645	196.552	187.768	177.435	180.544	183.436
	230	1400.09	206.585	200.055	191.047	177.603	175.485	186.461
	235	1450.13	205.223	197.048	185.191	176.946	167.331	182.4
	240	1500.58	205.304	196.671	187.286	174.82	173.195	179.298
	245	1580.29	201.231	194.143	184.231	168.539	165.827	174.418
	250	1497.38	201.698	188.164	177.928	168.219	168.88	166.935
	255	1750.35	194.344	195.155	176.421	167.383	170.88	164.856
	260	1825.4	191.054	186.335	178.919	162.7	158.353	161.91
	265	1900.87	189.492	186.665	182.018	159.92	162.636	167.758
	270	1700.65	190.72	187	180.04	162.686	152.219	168.79
	275	1500.39	191.362	188.736	180.851	159.962	152.604	164.631
	280	1250.96	185.328	184.565	184.288	162.664	148.564	157.442
	285	1000.37	194.513	182.863	173.355	158.726	152.96	152.941
	290	700.397	185.045	182.763	172.295	151.725	146.419	150.386
	295	300.303	177.016	183.349	173.368	155.886	147.475	147.889
	300	200.506	181.114	173.22	175.273	160.135	145.732	148.832
	305	100.277	181.578	178.011	173.044	154.495	138.899	148.24
	310	83.4656	181.728	181.026	174.786	147.874	141.008	144.011
	315	67.5965	181.693	180.647	172.304	152.35	138.419	140.487
	320	50.8863	177.937	175.845	173.253	145.125	141.834	138.413
	325	45.3487	180.456	177.336	169.768	141.263	134.535	137.347
	330	41.1289	173.919	177.739	167.82	145.25	137.84	136.175
	335	37.2463	171.552	176.043	167.809	143.571	131.96	137.869
	340	33.1128	173.827	177.047	170.472	145.45	131.789	143.472
	345	29.3418	172.824	175.199	172.48	141.77	130.529	134.951
	350	25.3515	175.482	177.389	168.582	142.039	136.3	131.415
	355	22.1274	175.753	180.439	163.804	138.642	138.093	131.047
	360	19.2315	165.511	179.418	163.137	142.474	134.492	121.434
	365	16.2748	171.258	183.125	158.961	139.878	132.333	123.559
	370	13.4545	173.229	179.896	165.355	146.643	128.287	124.408
	375	11.1352	167.217	189.275	164.16	142.626	126.238	121.712
	380	10.5457	171.52	190.003	168.276	145.175	127.867	122.236
	385	9.1332	172.154	184.633	161.068	142.482	129.833	125.703
	390	8.2811	169.975	186.833	162.596	137.246	132.812	118.511
	395	7.1145	176.023	185.503	159.553	143.397	127.749	120.952
	400	5.2335	175.682	178.582	159.616	144.883	134.458	121.91
	405		173.933	183.352	164.085	150.512	132.929	121.29
	410		172.091	183.786	163.355	151.395	130.37	121.462
	415		172.233	183.155	166.951	147.312	125.868	125.79
	420		170.916	185.617	168.925	147.881	130.155	121.584
	425		169.107	187.088	163.427	147.507	133.538	116.057
	430		174.662	178.304	165.651	145.925	135.227	117.645
	435		170.037	169.672	171.67	146.521	135.035	119.913
	440		178.26	171.032	164.854	147.426	136.33	115.944
	445		182.148	167.782	163.948	149.082	129.541	120.282
	450		180.595	161.78	167.719	155.172	128.636	119.867
	455		181.428	161.879	170.242	153.089	125.474	120.28
	460		179.531	166.114	173.73	150.427	131.042	122.383
	465		183.527	160.622	174.376	150.976	138.852	116.632
	470		180.228	163.731	176.422	147.669	133.53	119.737
	475		182.512	157.72	169.478	152.659	131.974	121.026
	480		189.457	153.149	177.631	152.933	127.101	123.45
	485		190.735	155.628	179.028	152.967	127.936	126.691
	490		193.965	156.076	175.189	154.874	130.791	127.132
	495		184.2	155.593	178.161	153.487	127.686	124.589
	500		181.093	154.66	172.644	154.117	128.906	128.544
	505		185.907	144.284	170.885	154.615	130.235	128.598
	510		179.256	140.63	168.968	151.473	132.923	131.146
	515		172.268	135.414	165.168	154.056	131.457	131.235
	520		167.546	130.035	166.105	156.569	131.548	131.996
	525		162.076	123.356	159.605	151.863	129.833	126.642
	530		155.56	121.111	153.905	148.299	134.394	134.262
	535		138.339	112.708	145.821	148.833	136.466	136.216
	540		134.843	104.953	136.528	144.865	137.014	137.518
	545		122.768	95.0338	134.728	145.262	136.149	136.472
	550		112.744	86.4284	126.02	149.195	137.18	137.649
	555		103.85	76.2529	117.589	145.638	137.034	137.064
	560		93.1314	66.2238	111.181	148.019	141.478	141.603
	565		82.4069	60.0666	98.2729	143.369	144.289	144.558
	570		70.9549	53.7484	89.544	141.421	147.108	148.998
	575		60.6421	42.4069	78.9167	135.847	152.96	153.75
	580		49.6496	30.9816	71.6871	128.863	148.126	148.568
	585		38.7859	26.7357	68.9683	122.292	151.662	154.53
	590		33.2477	24.3755	65.6292	117.269	148.122	149.707
	595		32.7932	21.3834	60.3835	104.818	148.257	152.309
	600		27.9635	20.048	55.5584	97.6021	143.702	144.232
	605		21.546	16.0796	49.0762	86.6787	145.43	144.943
	610		19.7954	12.333	45.4126	77.9917	140.705	138.366
	615		18.6555	9.36135	42.3112	68.7784	136.378	139.409
	620		16.0826	9.56214	42.1933	63.0545	135.267	137.163
	625		15.5931	8.97334	40.9918	52.6835	126.36	128.984
	630		15.1226	10.216	37.7712	45.1625	124.096	121.125
	635		14.0062	9.04673	35.064	33.3367	115.323	115.089
	640		11.5411	9.13035	33.1913	26.3233	112.071	114.475
	645		10.5045	7.80296	27.4189	21.4604	107.587	113.709
	650		9.23467	6.80261	22.2214	19.2891	101.799	112.844
	655		9.80766	4.63692	20.2805	18.43	92.4052	112.912
	660		9.19829	5.85381	19.4397	16.9006	86.11	110.093
	665		8.13831	6.3606	18.7636	13.1728	83.1352	109.918
	670		7.67751	6.87019	16.5192	13.3848	73.3899	108.219
	675		4.98631		13.3154	10.1414	68.3832	93.4183
	680		3.45897		10.2489	7.67892	63.9229	89.773
	685		2.90245		10.0474	7.0847	55.1643	81.7484
	690		2.8644		10.3	7.4788	50.0698	75.555
	695		3.92644		11.5662	7.91513	43.4974	67.5168
	700		5.615		14.5081	6.94325	38.5483	61.3346
	705				16.0709	4.50482	38.2787	52.0766
	710				15.6629	3.47658	34.699	41.2143
	715				12.6398	2.08996	30.3068	33.6073
	720				11.2384	3.31875	25.8753	28.0403
	725				12.8179	3.88513	25.9474	24.9575
	730				11.7909	5.17421	21.346	23.1492
	735				10.6469	5.42801	17.5146	21.1163
	740				8.95276	2.69453	17.6108	18.3242
	745				6.51749		16.6327	16.6467
	750				4.70622		18.6852	14.7594
	755				4.26065		16.0466	12.954
	760				3.86473		15.2436	11.9221
	765				4.31448		12.4463	13.1499
	770				7.30385		12.0661	13.3481
	775				8.87077		10.3016	12.2841
	780				9.09746		10.5406	10.613
							11.0385	9.34646
							10.1178	8.18925
	--			--	--	--	8.66204	8.27442
	--			--	--	--	5.08454	8.35417
	--			--	--	--	3.12086	9.7868
	--			--	--	--	3.72191	8.98364
	--			--	--	--	4.85778	7.28172
	--			--	--	--	6.54374	5.75784
	--			--	--	--	8.64302	4.67337
	--			--	--	--	4.9593
	--			--	--	--	1.96617
	--			--	--	--	1.89429
	--			--	--	--	1.77416
	--			--	--	--	2.95553
	--			--	--	--	5.39213
	--			--	--	--	7.47152
	--			--	--	--	7.04287
	--			--	--	--	3.89076
	--		--	--	--	--	1.37592	--
	--		--	--	--	--	0.80799	--
	--		--	--	--	--	1.03741	--
	--		--	--	--	--	3.39439	--
	--		--	--	--	--	3.35917	--
