# Supplementary material for: Study of the Addition of a Thermoplastic Vulcanizate to a HDPE Composite Highly Filled with Magnesium Hydroxide and Its Effect on the Tensile and Flame Retardant Properties
Source: Hindawi journal article supplement (doi:10.1155/2019/4350870), 2019-10-17
Supplement: f1 [file 4350870.f1.zip › Data for Figure 6.xlsx]

## Sheet: Hoja1
	Data for Figure 6
	Temp °C	microMH	nanoMH	Blend	TPO-40	TPV-40
		100 - WeightLoss%	100 - WeightLoss%	100 - WeightLoss%	100 - WeightLoss%	100 - WeightLoss%
	250	99.29	98.8	99.97	99.71	99.58
	251	99.28	98.8	99.97	99.71	99.58
	252	99.28	98.79	99.96	99.71	99.57
	253	99.28	98.79	99.95	99.71	99.57
	254	99.27	98.79	99.95	99.71	99.57
	255	99.27	98.78	99.94	99.7	99.56
	256	99.26	98.78	99.94	99.7	99.56
	257	99.26	98.78	99.93	99.7	99.55
	258	99.25	98.77	99.93	99.7	99.55
	259	99.25	98.77	99.92	99.7	99.55
	260	99.24	98.77	99.92	99.7	99.54
	261	99.23	98.76	99.91	99.7	99.53
	262	99.23	98.76	99.9	99.69	99.53
	263	99.22	98.76	99.9	99.69	99.53
	264	99.21	98.76	99.89	99.68	99.52
	265	99.21	98.75	99.88	99.68	99.51
	266	99.19	98.75	99.88	99.68	99.51
	267	99.18	98.75	99.87	99.68	99.5
	268	99.18	98.74	99.87	99.68	99.5
	269	99.16	98.74	99.86	99.68	99.49
	270	99.16	98.74	99.85	99.67	99.48
	271	99.14	98.73	99.84	99.67	99.48
	272	99.13	98.73	99.83	99.67	99.47
	273	99.12	98.73	99.82	99.66	99.46
	274	99.1	98.73	99.81	99.66	99.45
	275	99.09	98.72	99.8	99.66	99.44
	276	99.08	98.72	99.8	99.65	99.44
	277	99.07	98.72	99.78	99.65	99.43
	278	99.05	98.71	99.77	99.65	99.42
	279	99.04	98.71	99.76	99.65	99.41
	280	99.02	98.7	99.75	99.64	99.4
	281	99.01	98.7	99.74	99.64	99.39
	282	98.99	98.7	99.72	99.64	99.38
	283	98.98	98.69	99.71	99.63	99.37
	284	98.96	98.69	99.7	99.63	99.36
	285	98.95	98.68	99.69	99.63	99.35
	286	98.94	98.67	99.67	99.62	99.34
	287	98.92	98.67	99.65	99.62	99.33
	288	98.91	98.66	99.64	99.62	99.32
	289	98.9	98.65	99.63	99.62	99.31
	290	98.88	98.64	99.61	99.61	99.3
	291	98.86	98.62	99.59	99.61	99.29
	292	98.84	98.6	99.58	99.6	99.28
	293	98.82	98.58	99.56	99.6	99.27
	294	98.8	98.56	99.54	99.59	99.25
	295	98.79	98.53	99.52	99.59	99.24
	296	98.77	98.49	99.5	99.58	99.23
	297	98.74	98.46	99.48	99.58	99.22
	298	98.72	98.41	99.46	99.57	99.15
	299	98.7	98.37	99.45	99.57	99.1
	300	98.68	98.31	99.43	99.56	98.99
	301	98.64	98.26	99.4	99.54	98.91
	302	98.61	98.2	99.38	99.5	98.79
	303	98.58	98.13	99.36	99.44	98.75
	304	98.54	98.06	99.34	99.38	98.66
	305	98.51	97.99	99.32	99.32	98.56
	306	98.47	97.91	99.29	99.27	98.46
	307	98.43	97.82	99.27	99.22	98.41
	308	98.37	97.74	99.25	98.89	98.38
	309	98.32	97.64	99.22	98.71	98.28
	310	98.27	97.55	99.2	98.59	98.19
	311	98.21	97.45	99.17	98.54	98.14
	312	98.15	97.34	99.15	98.48	97.99
	313	98.08	97.24	99.12	98.42	97.94
	314	98.01	97.12	99.1	98.35	97.89
	315	97.94	97	99.07	98.28	97.83
	316	97.87	96.88	99.04	98.21	97.77
	317	97.8	96.75	99.02	98.14	97.72
	318	97.72	96.62	98.99	98.06	97.65
	319	97.63	96.48	98.96	97.99	97.59
	320	97.55	96.33	98.94	97.9	97.52
	321	97.45	96.18	98.91	97.82	97.45
	322	97.35	96.02	98.88	97.72	97.38
	323	97.25	95.85	98.85	97.63	97.3
	324	97.14	95.68	98.82	97.53	97.22
	325	97.02	95.49	98.8	97.43	97.13
	326	96.89	95.3	98.77	97.33	97.04
	327	96.75	95.1	98.74	97.22	96.95
	328	96.6	94.88	98.71	97.1	96.85
	329	96.44	94.66	98.68	96.98	96.74
	330	96.27	94.42	98.66	96.86	96.63
	331	96.08	94.18	98.63	96.72	96.5
	332	95.88	93.92	98.6	96.59	96.38
	333	95.66	93.64	98.57	96.44	96.24
	334	95.42	93.36	98.54	96.3	96.1
	335	95.17	93.06	98.52	96.14	95.95
	336	94.9	92.75	98.49	95.98	95.79
	337	94.62	92.43	98.46	95.81	95.63
	338	94.32	92.1	98.43	95.63	95.46
	339	94	91.75	98.41	95.44	95.28
	340	93.67	91.39	98.38	95.24	95.1
	341	93.32	91.01	98.35	95.04	94.91
	342	92.96	90.63	98.33	94.81	94.71
	343	92.59	90.23	98.3	94.58	94.5
	344	92.2	89.81	98.27	94.33	94.29
	345	91.8	89.39	98.25	94.07	94.07
	346	91.39	88.95	98.22	93.78	93.85
	347	90.97	88.5	98.19	93.48	93.61
	348	90.53	88.04	98.17	93.15	93.37
	349	90.08	87.57	98.14	92.81	93.12
	350	89.62	87.09	98.12	92.44	92.86
	351	89.14	86.59	98.09	92.05	92.59
	352	88.65	86.09	98.07	91.63	92.31
	353	88.15	85.58	98.04	91.2	92.03
	354	87.63	85.06	98.02	90.74	91.74
	355	87.1	84.53	97.99	90.27	91.44
	356	86.55	84	97.96	89.77	91.13
	357	86	83.46	97.93	89.27	90.82
	358	85.43	82.92	97.9	88.74	90.49
	359	84.86	82.37	97.88	88.21	90.16
	360	84.27	81.82	97.85	87.66	89.83
	361	83.67	81.26	97.82	87.11	89.48
	362	83.07	80.71	97.79	86.55	89.14
	363	82.47	80.16	97.76	85.99	88.78
	364	81.86	79.61	97.73	85.42	88.43
	365	81.25	79.06	97.69	84.86	88.07
	366	80.65	78.52	97.66	84.29	87.71
	367	80.05	77.99	97.63	83.72	87.35
	368	79.46	77.47	97.59	83.16	86.99
	369	78.89	76.96	97.55	82.59	86.64
	370	78.34	76.46	97.51	82.03	86.29
	371	77.83	75.98	97.47	81.46	85.95
	372	77.34	75.53	97.43	80.91	85.6
	373	76.87	75.1	97.38	80.35	85.27
	374	76.42	74.69	97.34	79.79	84.94
	375	75.98	74.32	97.29	79.24	84.62
	376	75.55	73.98	97.24	78.67	84.31
	377	75.15	73.69	97.2	78.12	84.01
	378	74.76	73.43	97.15	77.57	83.72
	379	74.41	73.23	97.09	77.02	83.44
	380	74.08	73.07	97.04	76.47	83.17
	381	73.78	72.96	96.98	75.91	82.92
	382	73.53	72.88	96.92	75.36	82.67
	383	73.32	72.83	96.86	74.8	82.43
	384	73.16	72.78	96.8	74.24	82.2
	385	73.07	72.73	96.74	73.66	81.98
	386	73.01	72.7	96.68	73.07	81.77
	387	72.96	72.66	96.61	72.45	81.56
	388	72.92	72.63	96.54	71.8	81.34
	389	72.88	72.6	96.47	71.11	81.12
	390	72.84	72.57	96.39	70.37	80.89
	391	72.8	72.54	96.3	69.59	80.65
	392	72.77	72.51	96.22	68.75	80.39
	393	72.74	72.49	96.13	67.88	80.11
	394	72.7	72.46	96.03	66.96	79.8
	395	72.67	72.44	95.92	66.01	79.47
	396	72.64	72.42	95.81	65.02	79.11
	397	72.61	72.4	95.69	63.99	78.73
	398	72.58	72.37	95.55	62.94	78.31
	399	72.55	72.35	95.41	61.86	77.87
	400	72.53	72.33	95.27	60.76	77.39
	401	72.5	72.31	95.11	59.63	76.88
	402	72.47	72.29	94.94	58.48	76.34
	403	72.45	72.28	94.76	57.32	75.76
	404	72.42	72.26	94.56	56.14	75.14
	405	72.4	72.24	94.35	54.96	74.48
	406	72.37	72.22	94.13	53.75	73.78
	407	72.34	72.2	93.89	52.51	73.04
	408	72.32	72.18	93.63	51.22	72.25
	409	72.3	72.17	93.35	49.97	71.41
	410	72.27	72.15	93.06	48.82	70.52
	411	72.25	72.13	92.73	47.84	69.56
	412	72.23	72.12	92.39	47.02	68.54
	413	72.2	72.1	92.03	46.32	67.47
	414	72.18	72.08	91.65	45.72	66.35
	415	72.16	72.07	91.25	45.2	65.17
	416	72.14	72.05	90.82	44.75	63.94
	417	72.11	72.04	90.37	44.36	62.66
	418	72.09	72.02	89.89	44	61.34
	419	72.07	72.01	89.39	43.68	59.97
	420	72.05	71.99	88.86	43.39	58.57
	421	72.02	71.98	88.3	43.13	57.14
	422	72	71.96	87.72	42.9	55.7
	423	71.98	71.95	87.1	42.68	54.26
	424	71.96	71.93	86.45	42.49	52.84
	425	71.93	71.92	85.77	42.32	51.46
	426	71.91	71.9	85.05	42.16	50.15
	427	71.89	71.89	84.29	42.02	48.92
	428	71.87	71.87	83.5	41.89	47.82
	429	71.85	71.86	82.65	41.77	46.86
	430	71.83	71.84	81.77	41.67	46.04
	431	71.8	71.83	80.85	41.58	45.34
	432	71.78	71.82	79.87	41.51	44.75
	433	71.76	71.8	78.82	41.43	44.23
	434	71.74	71.79	77.73	41.37	43.77
	435	71.72	71.78	76.57	41.32	43.37
	436	71.69	71.76	75.3	41.27	43
	437	71.67	71.75	73.96	41.23	42.67
	438	71.64	71.73	72.59	41.2	42.37
	439	71.62	71.72	71.14	41.16	42.1
	440	71.59	71.7	69.59	41.13	41.86
	441	71.57	71.69	67.99	41.11	41.65
	442	71.54	71.68	66.28	41.08	41.46
	443	71.52	71.67	64.51	41.06	41.29
	444	71.49	71.65	62.65	41.04	41.15
	445	71.46	71.64	60.64	41.02	41.03
	446	71.43	71.62	58.58	41	40.93
	447	71.4	71.61	56.37	40.98	40.85
	448	71.37	71.6	54.09	40.97	40.77
	449	71.34	71.58	51.72	40.96	40.71
	450	71.31	71.57	49.24	40.94	40.66
	451	71.28	71.56	46.67	40.93	40.62
	452	71.24	71.54	44.01	40.91	40.59
	453	71.21	71.53	41.31	40.89	40.56
	454	71.17	71.52	38.55	40.88	40.54
	455	71.14	71.5	35.74	40.86	40.52
	456	71.1	71.49	32.91	40.85	40.51
	457	71.06	71.48	30.07	40.83	40.49
	458	71.02	71.46	27.23	40.82	40.47
	459	70.98	71.45	24.43	40.81	40.46
	460	70.94	71.44	21.68	40.79	40.45
	461	70.9	71.43	19.02	40.78	40.44
	462	70.86	71.41	16.45	40.76	40.43
	463	70.82	71.4	14.02	40.75	40.42
	464	70.78	71.39	11.74	40.73	40.41
	465	70.73	71.37	9.679	40.72	40.4
	466	70.69	71.36	7.87	40.7	40.39
	467	70.65	71.35	6.266	40.69	40.39
	468	70.61	71.34	4.911	40.68	40.38
	469	70.56	71.32	3.803	40.66	40.37
	470	70.52	71.31	2.927	40.65	40.37
	471	70.48	71.3	2.261	40.64	40.36
	472	70.44	71.28	1.781	40.62	40.35
	473	70.4	71.27	1.451	40.6	40.34
	474	70.36	71.26	1.234	40.59	40.33
	475	70.32	71.24	1.102	40.57	40.33
	476	70.28	71.23	1.033	40.55	40.32
	477	70.24	71.22	0.9911	40.54	40.31
	478	70.21	71.21	0.963	40.53	40.31
	479	70.17	71.19	0.9512	40.51	40.3
	480	70.14	71.18	0.9478	40.49	40.3
	481	70.11	71.17	0.9478	40.48	40.29
	482	70.08	71.15	0.9473	40.46	40.28
	483	70.05	71.14	0.9476	40.45	40.28
	484	70.02	71.14	0.9483	40.44	40.27
	485	70	71.14	0.9517	40.42	40.27
	486	69.97	71.13	0.9537	40.41	40.26
	487	69.95	71.11	0.9558	40.39	40.25
	488	69.93	71.1	0.9572	40.37	40.25
	489	69.91	71.09	0.9568	40.36	40.24
	490	69.89	71.08	0.9602	40.34	40.24
	491	69.87	71.06	0.9639	40.33	40.23
	492	69.85	71.05	0.9655	40.31	40.23
	493	69.83	71.04	0.9649	40.3	40.22
	494	69.81	71.02	0.9671	40.28	40.22
	495	69.79	71.01	0.9721	40.27	40.21
	496	69.77	71	0.9759	40.25	40.21
	497	69.76	70.98	0.9776	40.24	40.2
	498	69.74	70.96	0.9783	40.23	40.19
	499	69.72	70.93	0.9823	40.21	40.19
	500	69.71	70.92	0.9864	40.19	40.18
	501	69.69	70.91	0.9874	40.18	40.18
	502	69.68	70.9	0.988	40.17	40.17
	503	69.66	70.88	0.9893	40.16	40.17
	504	69.65	70.87	0.9923	40.14	40.16
	505	69.63	70.86	0.9966	40.13	40.15
	506	69.62	70.84	1.001	40.11	40.15
	507	69.6	70.83	1.003	40.1	40.15
	508	69.59	70.82	1.004	40.09	40.14
	509	69.58	70.8	1.006	40.08	40.13
	510	69.56	70.79	1.01	40.46	40.28
	511	69.55	70.78	1.013	40.45	40.28
	512	69.53	70.76	1.019	40.44	40.27
	513	69.52	70.75	1.02	40.42	40.27
	514	69.51	70.73	1.02	40.41	40.26
	515	69.5	70.72	1.022	40.39	40.25
	516	69.48	70.71	1.024	40.37	40.25
	517	69.47	70.69	1.029	40.36	40.24
	518	69.45	70.68	1.032	40.34	40.24
	519	69.44	70.66	1.033	40.33	40.23
	520	69.43	70.65	1.037	40.31	40.23
	521	69.42	70.64	1.041	40.3	40.22
	522	69.4	70.62	1.039	40.28	40.22
	523	69.39	70.61	1.043	40.27	40.21
	524	69.38	70.6	1.048	40.25	40.21
	525	69.36	70.58	1.051	40.24	40.2
	526	69.35	70.57	1.055	40.23	40.19
	527	69.34	70.55	1.057	40.21	40.19
	528	69.33	70.53	1.059	40.19	40.18
	529	69.31	70.52	1.061	40.18	40.18
	530	69.3	70.5	1.064	40.17	40.17
	531	69.29	70.49	1.067	40.16	40.17
	532	69.28	70.47	1.073	40.14	40.16
	533	69.27	70.46	1.077	40.13	40.15
	534	69.25	70.44	1.079	40.11	40.15
	535	69.24	70.42	1.082	40.1	40.15
	536	69.23	70.41	1.084	40.09	40.14
	537	69.21	70.39	1.085	40.08	40.13
	538	69.2	70.38	1.086	40.23	40.19
	539	69.19	70.36	1.092	40.21	40.19
	540	69.18	70.35	1.096	40.19	40.18
	541	69.16	70.33	1.101	40.18	40.18
	542	69.15	70.31	1.104	40.17	40.17
	543	69.14	70.3	1.107	40.16	40.17
	544	69.13	70.28	1.109	40.14	40.16
	545	69.12	70.27	1.111	40.13	40.15
	546	69.1	70.25	1.112	40.11	40.15
	547	69.09	70.23	1.115	40.1	40.15
	548	69.08	70.22	1.121	40.09	40.14
	549	69.07	70.2	1.124	40.08	40.13
	550	69.06	70.18	1.127	40.08	40.13
